# Supplementary material for: Metallophthalocyanines as triplet sensitizers for highly efficient photon upconversion based on sensitized triplet-triplet annihilation
Source: Royal Society of Chemistry journal article supplement (doi:10.1039/c6pp00172f), 2016-07-05
Supplement: c6pp00172f1.pdf [file c6pp00172f1.pdf]

## Metallophthalocyanines as Triplet Sensitizers for High Efficient Photon Upconversion Based on Sensitized Triplet–Triplet Annihilation

J. L. Han,<sup>a,b</sup> J. You,<sup>\* a,b</sup> H. Yonemura,<sup>\* c,d</sup> S. Yamada,<sup>c,d</sup> S. R. Wang<sup>a,b</sup> and X. G. Li<sup>a,b</sup>

a. Tianjin University, School of Chemical Engineering and Technology, Tianjin 300072, China. E-mail: Youj1983@tju.edu.cn; Fax: +86-22-27404208; Tel: +86-22-27404208

b. Collaborative Innovation Center of Chemical Science and Engineering, Tianjin 300072, China

c. Department of Applied Chemistry, Faculty of Engineering, Kyushu University, 744 Motoooka, Nishi-ku, Fukuoka, Japan. E-mail: yonemura.hiroaki.567@m.kyushu-u.ac.jp; Fax: +81-92-802-2815; Tel: +81-92-802-2814

d. Center for Future Chemistry, Kyushu University, 744 Motoooka, Nishi-ku, Fukuoka, Japan.

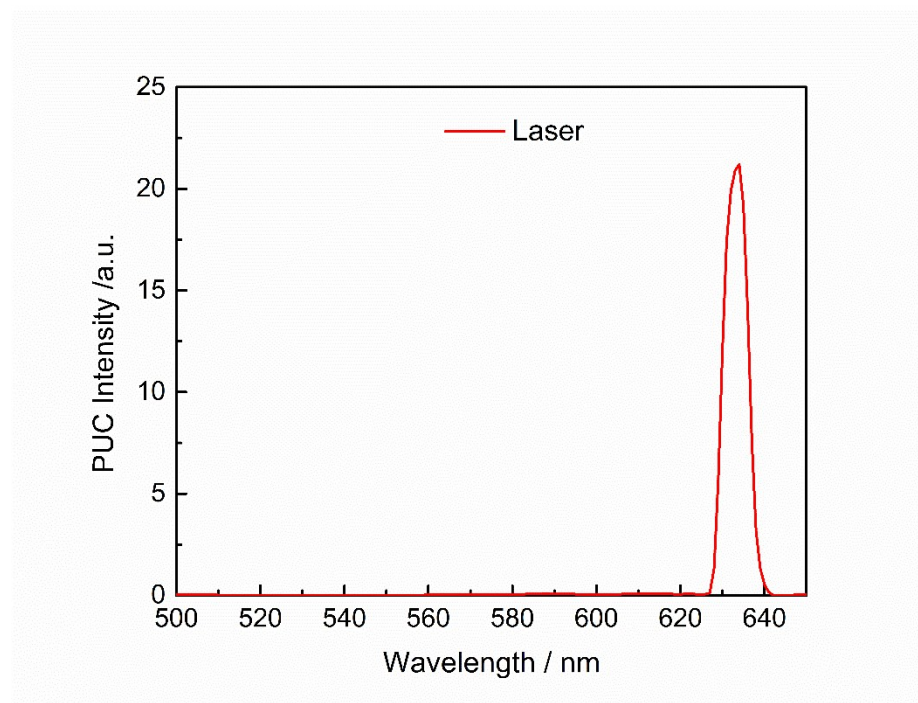

Fig. S1 Upconverted emission spectrum of rubrene (Rub) excited by He-Ne laser in bezonitrile at room temperature.

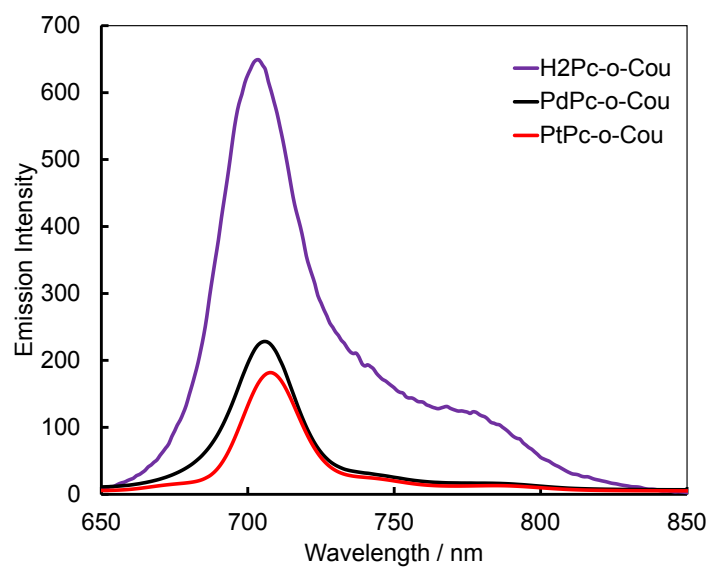

Fig. S2 Fluorescence spectra of non-metallated phthalocyanine (H<sub>2</sub>Pc-o-Cou) and metallated phthalocyanine (PdPc-o-Cou and PtPc-o-Cou) excited at 633 nm in benzonitrile at room temperature.
